# Supplementary material for: Comparative Analysis of Nucleic Acid-Binding Polymers as Potential Anti-Inflammatory Nanocarriers
Source: MDPI journal article supplement (doi:10.3390/pharmaceutics16010010), 2023-12-20
Supplement: s1 [file s1]

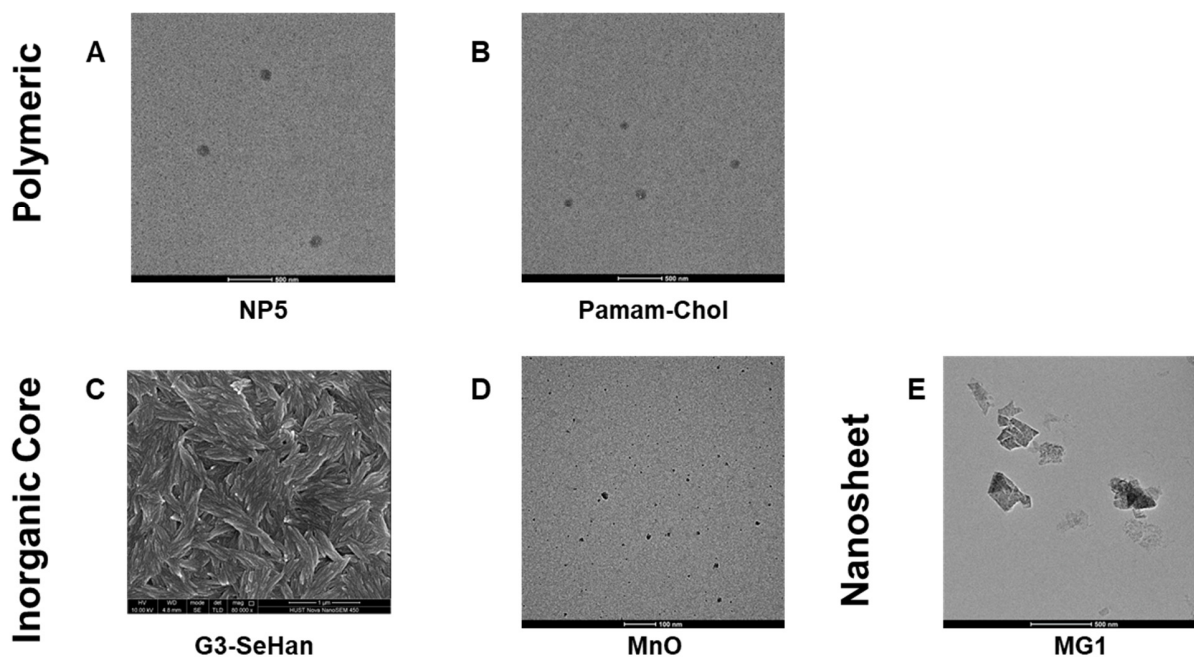

**Figure S1. Electron Microscopy of NABNs.** (A) SEM of Nanoparticle 5. (B) SEM of PAMAM-Chol Nanoparticles. (C) TEM of G3-SeHan Composite. (D) TEM of MnO particles. (E) TEM of MG1 2D Nanosheet.
